# Supplementary material for: Association of Long Noncoding RNA HOTAIR Polymorphism and the Clinical Manifestations of Diabetic Retinopathy
Source: MDPI journal article supplement (doi:10.3390/ijerph192114592), 2022-11-07
Supplement: s1 [file s1]

**Table S1.** The context sequences of four HOTAIR SNPs in the study.

| Variable                             | Assay ID       | Context Sequence                                            |
|--------------------------------------|----------------|-------------------------------------------------------------|
| <b>HOTAIR</b><br><b>(rs920778)</b>   | C__9162435_20  | TACAGCTTAAATGTCTGAATGTTAC[A/G]GTTT<br>CCTTCAGAAAACAAGGCGGTA |
| <b>HOTAIR</b><br><b>(rs12427129)</b> | C__2104247_10  | GCCCACTCCGTGGCCAAGGAGCCGG[C/T]CAA<br>AGGAGCCGCCCCCAGTAGGTAG |
| <b>HOTAIR</b><br><b>(rs4759314)</b>  | C__27930754_10 | GCTTGGAAGGGATATAAACAGGCCA[A/G]GCG<br>GATGCAAGTTAATAAAACCTGA |
| <b>HOTAIR</b><br><b>(rs1899663)</b>  | C__2104251_20  | TCCAAAAGCCTCTAATTGTTGTCAC[A/C]TCCA<br>CCCTCCTCAACTGGAAAAATG |

**Figure S1**

*HOTAIR* rs920778

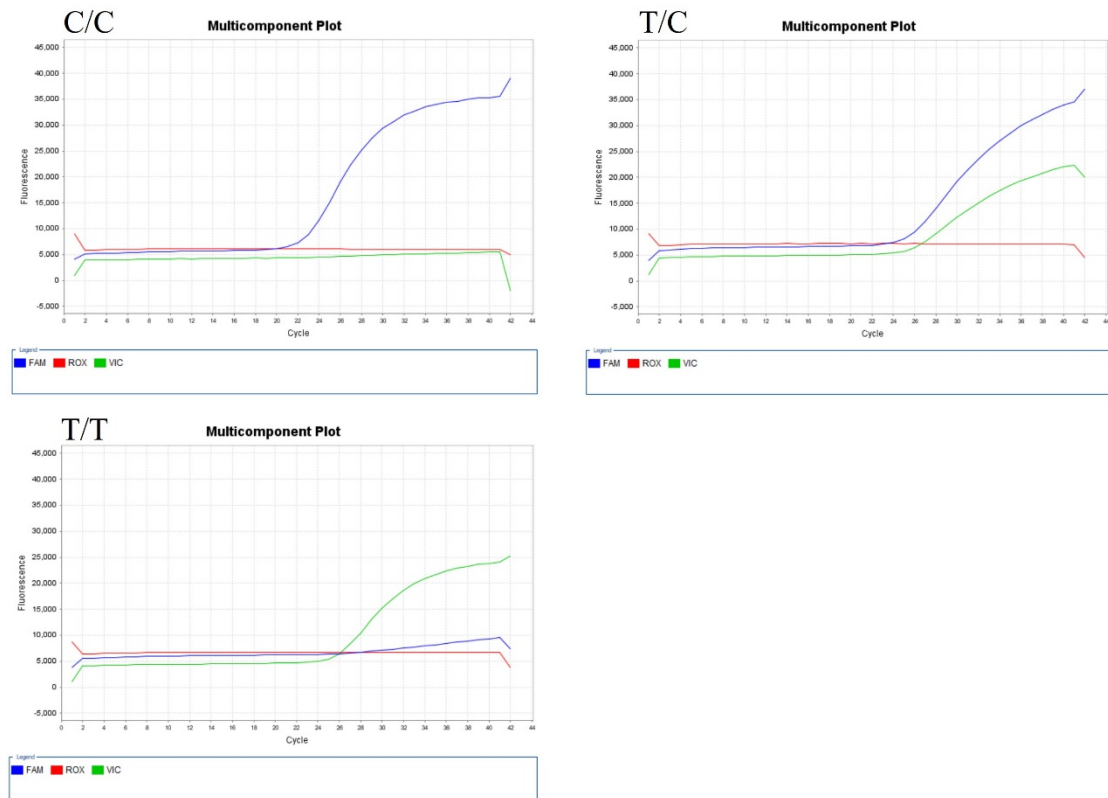

Figure S1: Representative TaqMan assay for *HOTAIR* rs920778 genotyping.

**Figure S2**

*HOTAIR* rs12427129

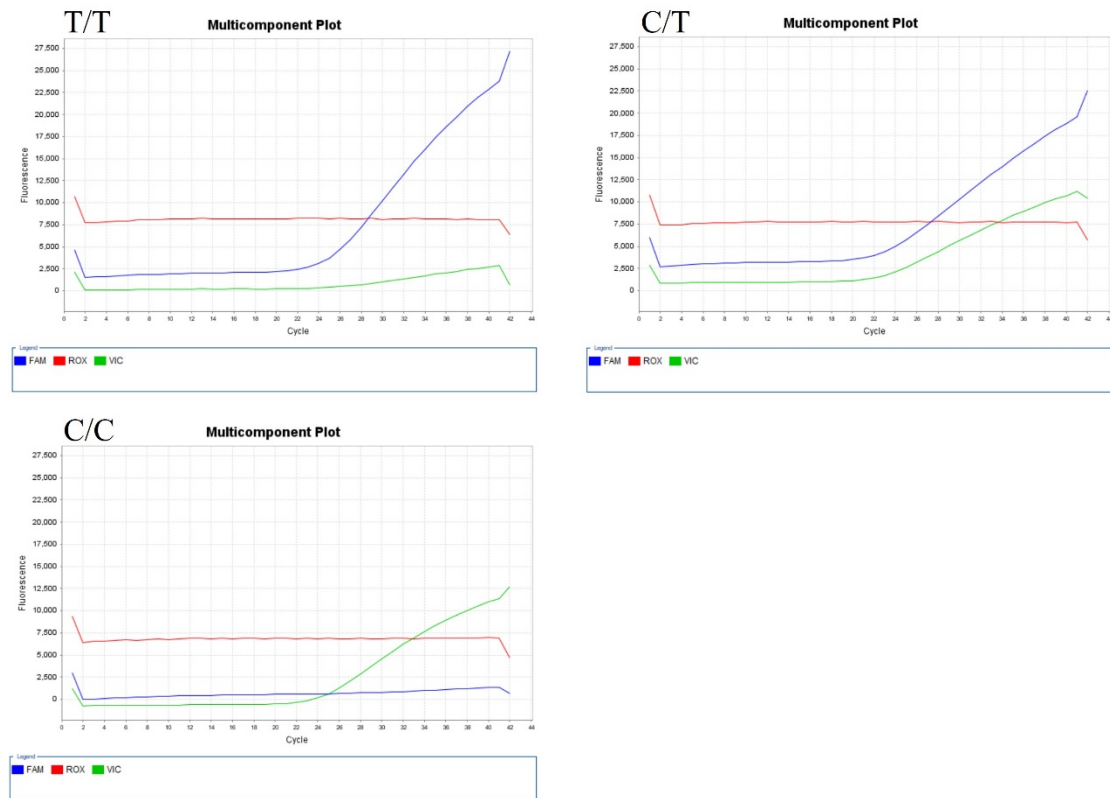

Figure S2: Representative TaqMan assay for *HOTAIR* rs12427129 genotyping.

**Figure S3**

*HOTAIR* rs4759314

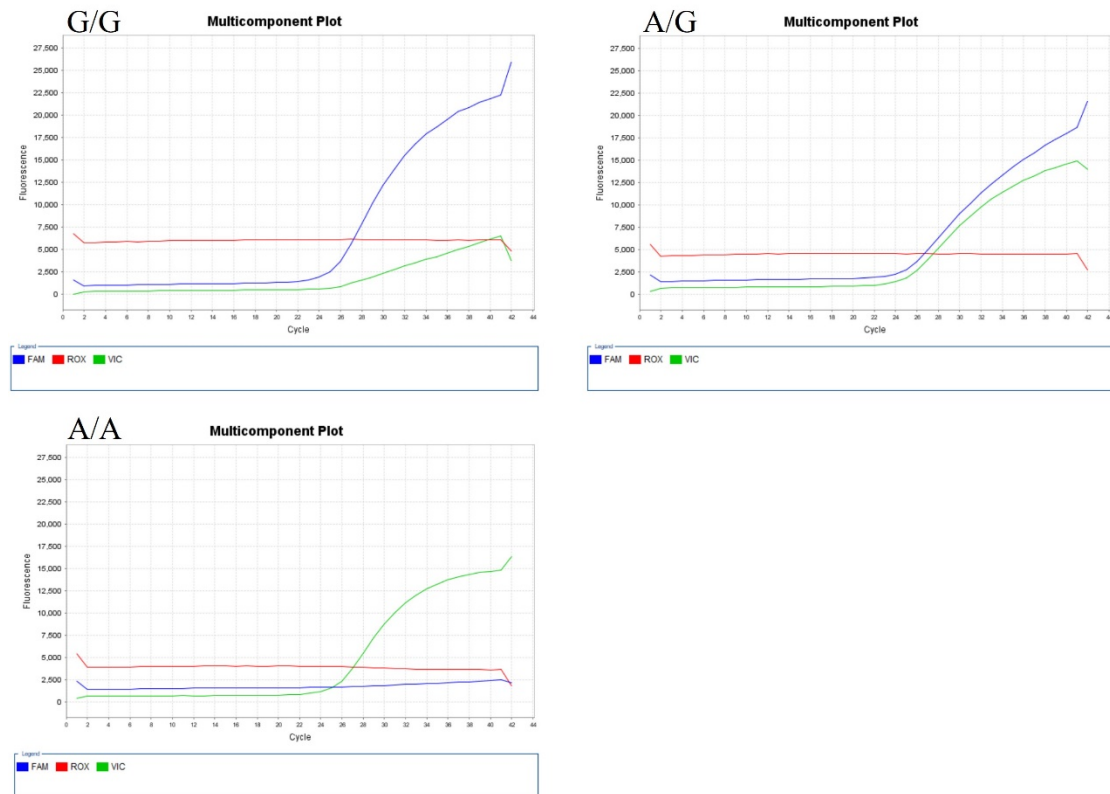

Figure S3: Representative TaqMan assay for *HOTAIR* rs4759314 genotyping.

**Figure S4**

*HOTAIR* rs1899663

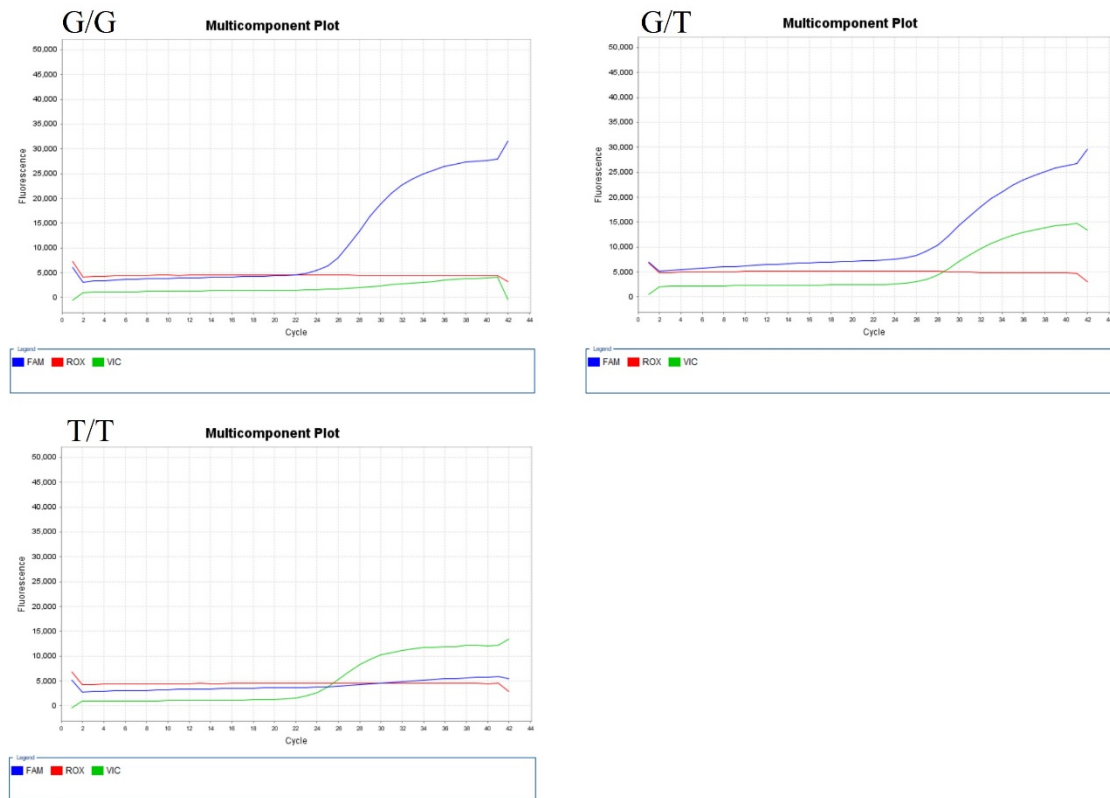

Figure S4: Representative TaqMan assay for *HOTAIR* rs1899663 genotyping.
